# Supplementary material for: Simultaneous determination of 11 antiseptic ingredients in surface water based on polypyrrole decorated magnetic nanoparticles
Source: Royal Society of Chemistry journal article supplement (doi:10.1039/d0ra07064e), 2020-01-01
Supplement: d0ra07064e1.pdf [file d0ra07064e1.pdf]

## Supplementary material

Simultaneous determination of 11 antiseptic ingredients in surface water based on polypyrrole decorated magnetic nanoparticles

Mengyan Zhang,<sup>a</sup> Kaoqi Lian,<sup>a</sup> Lianfeng Ai,<sup>b</sup> Weijun Kang<sup>\*a</sup> and Tangjuan Zhao<sup>\*\*a</sup>

<sup>a</sup> Hebei Key Laboratory of Environment and Human Health, School of Public Health, Hebei Medical University, Shijiazhuang, 050017, PR China

E-mail: kangwj158@163.com; tangjuan2002@163.com

<sup>b</sup> Technology Center of Shijiazhuang Customs, Shijiazhuang, 050051, China

## Table S1

Table S1 Sample information.

| Month    | Sample No. |              |          |
|----------|------------|--------------|----------|
|          | Zhengding  | Shijiazhuang | Gaocheng |
| January  | JA1        | JA2          | JA3      |
| February | FE1        | FE2          | FE3      |
| March    | MR1        | MR2          | MR3      |
| April    | AP1        | AP2          | AP3      |
| May      | MY1        | MY2          | MY3      |
| June     | JU1        | JU2          | JU3      |

## Table S2

Table S2 Gradient elution program of the proposed method.

| Time (min) | A*% | B**% | Flow rate (mL min <sup>-1</sup> ) |
|------------|-----|------|-----------------------------------|
| 0.0        | 50  | 50   | 0.30                              |
| 1.0        | 20  | 75   | 0.30                              |
| 1.5        | 35  | 65   | 0.30                              |
| 8.0        | 25  | 75   | 0.30                              |
| 8.1        | 10  | 90   | 0.30                              |
| 9.0        | 10  | 90   | 0.30                              |
| 9.1        | 50  | 50   | 0.30                              |
| 12.0       | 50  | 50   | 0.30                              |

\* Ultrapure water with 0.10% formic acid and 0.30% 1.0 mM ammonium acetate

\*\* Acetonitrile

**Table S3**

Table S3 The matrix effects of the method validation.

| Compound | ME (%)                         |                                |                                |
|----------|--------------------------------|--------------------------------|--------------------------------|
|          | Spiked 10 $\mu\text{g L}^{-1}$ | Spiked 20 $\mu\text{g L}^{-1}$ | Spiked 50 $\mu\text{g L}^{-1}$ |
| PCMP     | 69.61                          | 75.34                          | 76.28                          |
| C12-BAC  | 89.32                          | 91.06                          | 93.95                          |
| BAB      | 85.41                          | 93.05                          | 93.68                          |
| BEC      | 82.17                          | 89.06                          | 92.49                          |
| C14-BAC  | 90.24                          | 94.18                          | 96.03                          |
| TCC      | 88.02                          | 89.97                          | 92.58                          |
| TCS      | 70.45                          | 76.31                          | 79.09                          |
| CFC      | 72.66                          | 75.09                          | 79.81                          |
| BCP      | 72.51                          | 74.28                          | 77.09                          |
| C16-BAC  | 91.67                          | 95.48                          | 98.03                          |
| HCP      | 69.95                          | 71.18                          | 75.02                          |

Fig. S1

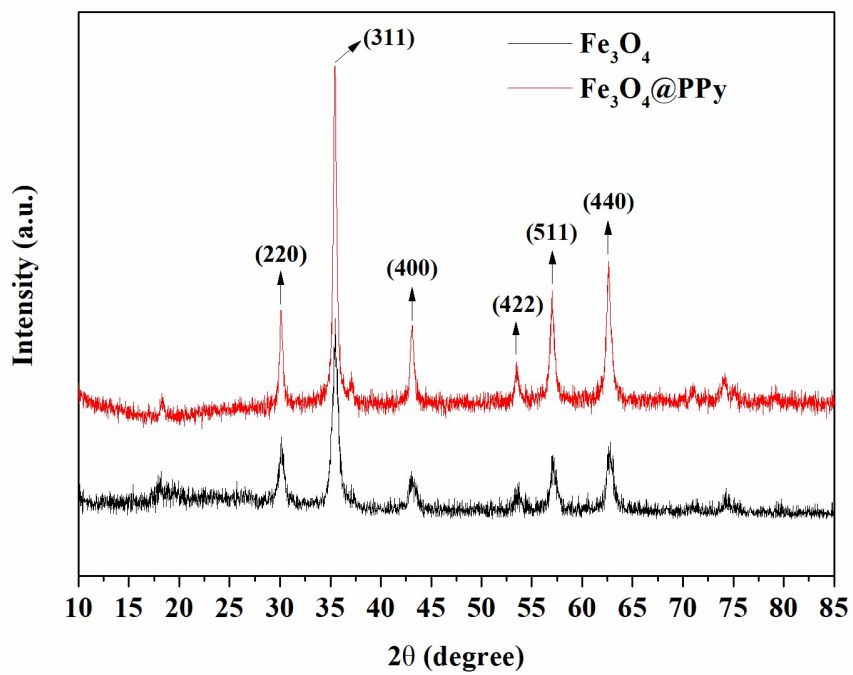

Fig. S1 XRD of  $\text{Fe}_3\text{O}_4$  and  $\text{Fe}_3\text{O}_4@PPy$ .

Fig. S2

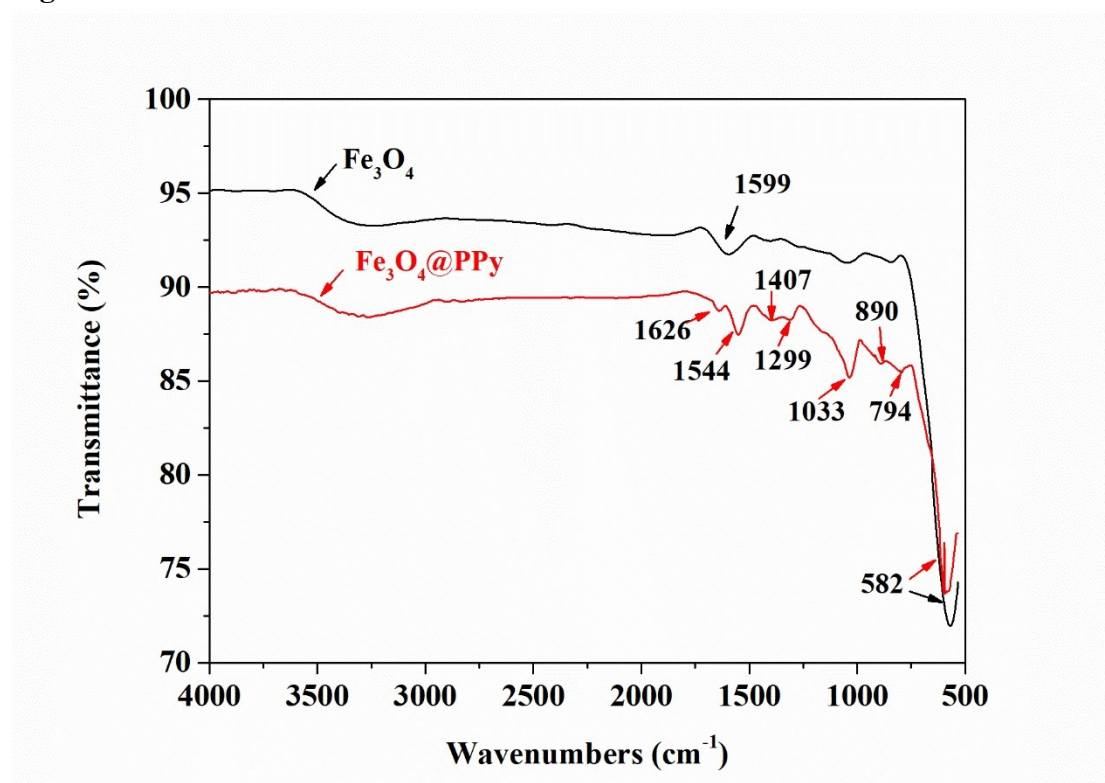

Fig. S2 FT-IR of Fe<sub>3</sub>O<sub>4</sub> and Fe<sub>3</sub>O<sub>4</sub>@PPy.

Fig. S3

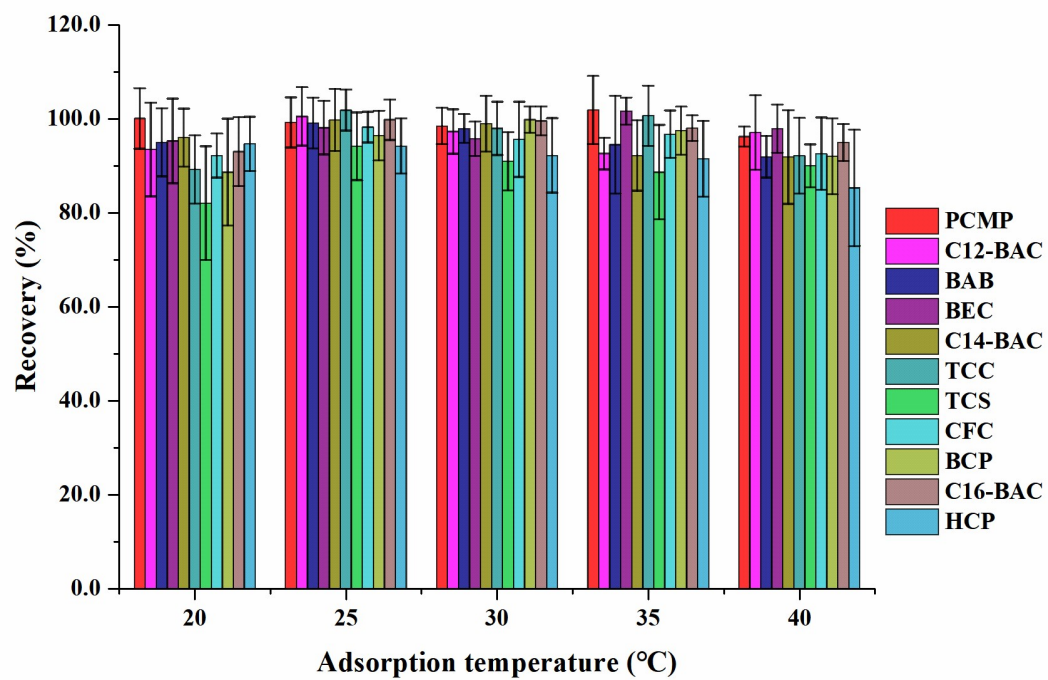

Fig. S3 Effect of adsorbent temperature on extraction efficiency of  $\text{Fe}_3\text{O}_4@\text{PPy}$ .
